# Supplementary material
Source: PubMed Central journal article supplement (PMC8592562)
Supplement: mmc1.pdf [file mmc1.pdf]

# THE LANCET

## Rheumatology

### Supplementary appendix

This appendix formed part of the original submission and has been peer reviewed.  
We post it as supplied by the authors.

Supplement to: Andersen K M, Bates B A, Rashidi E S, et al. Long-term use of immunosuppressive medicines and in-hospital COVID-19 outcomes: a retrospective cohort study using data from the National COVID Cohort Collaborative. *Lancet Rheumatol* 2021; published online Nov 15. [https://doi.org/10.1016/S2665-9913\(21\)00325-8](https://doi.org/10.1016/S2665-9913(21)00325-8).

## Table of Contents

|                                                                                                                                                                                 |    |
|---------------------------------------------------------------------------------------------------------------------------------------------------------------------------------|----|
| eTable 1. Immunosuppressive Drugs Considered in Exposure Definition .....                                                                                                       | 2  |
| eTable 2. Definitions for Variables Included in Propensity Score.....                                                                                                           | 5  |
| eTable 3. Frequency of Immunosuppressive Drug Classes in Cohort.....                                                                                                            | 9  |
| eTable 4. Prevalence of 17 Comorbidities Among Adults Hospitalized with COVID-19....                                                                                            | 10 |
| eTable 5. Laboratory Measures and Vital Signs on Day of Admission, Before and After<br>Propensity Score Matching.....                                                           | 11 |
| eTable 6. E-Values for Strength of Association Between Immunosuppressive Medication<br>Classes and Clinical Outcomes in COVID.....                                              | 12 |
| eTable 7. Hazard ratios and 95% confidence intervals for the association between long-<br>term immunosuppression and invasive mechanical ventilation, by medication class ..... | 13 |
| eTable 8. Hazard ratios and 95% confidence intervals for the association between long-<br>term immunosuppression and in-hospital death, by medication class.....                | 14 |
| eTable 9. Results from Sensitivity Analyses.....                                                                                                                                | 15 |
| eTable 10. Association Between Chronic Immunosuppression and Clinical Outcomes in<br>COVID, for Race and Ethnicity Groups.....                                                  | 16 |
| eFigure 1. Analytic Cohort Derivation.....                                                                                                                                      | 17 |
| eFigure 2. Weekly Volume of Admissions in the N3C, March 18, 2020 through June 2,<br>2021.....                                                                                  | 18 |
| eFigure 3. Covariate Balance Before and After Propensity Score Matching.....                                                                                                    | 19 |
| eFigure 4. Propensity Score Distribution Before and After Matching.....                                                                                                         | 20 |
| eFigure 5. Weekly Percentage of Hospitalized Adults with Invasive Mechanical<br>Ventilation, by Immune System Status.....                                                       | 21 |
| eFigure 6. Weekly Percentage of Hospitalized Adults Dying with COVID-19, by Immune<br>System Status.....                                                                        | 22 |
| eFigure 7. Association Between Chronic Immunosuppression and Invasive Mechanical<br>Ventilation Among Males, by Medication Classes.....                                         | 23 |
| eFigure 8. Association Between Chronic Immunosuppression and Invasive Mechanical<br>Ventilation Among Females, by Medication Classes.....                                       | 24 |
| eFigure 9. Association Between Chronic Immunosuppression and In-Hospital Death<br>Among Males, by Medication Classes.....                                                       | 25 |
| eFigure 10. Association Between Chronic Immunosuppression and In-Hospital Death<br>Among Females, by Medication Classes.....                                                    | 26 |

**eTable 1. Immunosuppressive Drugs Considered in Exposure Definition**

|                                        |                                                                                                                                                                                                                                                                                                                                                                                                                                                                                                         |
|----------------------------------------|---------------------------------------------------------------------------------------------------------------------------------------------------------------------------------------------------------------------------------------------------------------------------------------------------------------------------------------------------------------------------------------------------------------------------------------------------------------------------------------------------------|
| Interleukin inhibitors                 | daciluzumab, basiliximab, anakinra, riloncept, ustekinumab, tocilizumab, canakinumab, briakinumab, secukinumab, siltuximab, brodalumab, ixekizumab, sarilumab, sirukumab, guselkumab, tildrakizumab, risankizumab                                                                                                                                                                                                                                                                                       |
| Janus kinase inhibitors                | tofacitinib, baricitinib, upadacitinib                                                                                                                                                                                                                                                                                                                                                                                                                                                                  |
| Tumor necrosis factor alpha inhibitors | etanercept, infliximab, afelimomab, adalimumab, certolizumab pegol, golimumab, opinercept                                                                                                                                                                                                                                                                                                                                                                                                               |
| Other selective immunosuppressants     | muromonab-cd3, antilymphocyte immunoglobulin (horse), antithymocyte immunoglobulin (rabbit), sirolimus, leflunomide, alefacept, everolimus, gusperimus, efalizumab, abetimus, natalizumab, abatacept, eculizumab, belimumab, fingolimod, belatacept, teriflunomide, apremilast, vedolizumab, alemtuzumab, begelomab, ocrelizumab, ozanimod, emapalumab, cladribine, imlifidase, siponimod2eclometh, ravulizumab, thalidomide, lenalidomide, pirfenidone, pomalidomide, dimethyl fumarate, darvadstrocel |
|                                        | Defined using products cataloged in the WHO Anatomical Therapeutic Chemistry Class L04 "Selective Immunosuppressants" that were not interleukin inhibitors, janus kinase inhibitors, tumor necrosis factor alpha inhibitors or monoclonal antibodies.                                                                                                                                                                                                                                                   |
| Azathioprine                           | azathioprine                                                                                                                                                                                                                                                                                                                                                                                                                                                                                            |
| Calcineurin inhibitors                 | ciclosporin, cyclosporine, tacrolimus, voclosporin                                                                                                                                                                                                                                                                                                                                                                                                                                                      |
| Mycophenolic acid                      | mycophenolic acid, mycophenolate sodium, mycophenolate mofetil                                                                                                                                                                                                                                                                                                                                                                                                                                          |
| Anthracyclines                         | doxorubicin, daunorubicin, epirubicin, aclarubicin, zorubicin, idarubicin, mitoxantrone, pirarubicin, valrubicin, amrubicin, pixantrone                                                                                                                                                                                                                                                                                                                                                                 |
| Checkpoint inhibitors                  | ipilimumab, nivolumab, pembrolizumab, avelumab, atezolizumab, cemiplimab, durvalumab                                                                                                                                                                                                                                                                                                                                                                                                                    |
| Cyclophosphamide                       | cyclophosphamide                                                                                                                                                                                                                                                                                                                                                                                                                                                                                        |

Appendix: Use of Chronic Immunosuppressive Medicines and In-Hospital COVID-19 Outcomes: A Retrospective Cohort Study Using the National COVID Cohort Collaborative (N3C)

|                           |                                                                                                                                                                                                                                                                                                                                                                                                                                                                                                                                                                                                                                                                                                                                                                                                                                                                                                                                                                                                                                                                                                                                                                                                                                                                                                                                                                                                                                                                                                                                                                                                                                                                                                                                                                                                                                                                                                                                                                                                                                             |
|---------------------------|---------------------------------------------------------------------------------------------------------------------------------------------------------------------------------------------------------------------------------------------------------------------------------------------------------------------------------------------------------------------------------------------------------------------------------------------------------------------------------------------------------------------------------------------------------------------------------------------------------------------------------------------------------------------------------------------------------------------------------------------------------------------------------------------------------------------------------------------------------------------------------------------------------------------------------------------------------------------------------------------------------------------------------------------------------------------------------------------------------------------------------------------------------------------------------------------------------------------------------------------------------------------------------------------------------------------------------------------------------------------------------------------------------------------------------------------------------------------------------------------------------------------------------------------------------------------------------------------------------------------------------------------------------------------------------------------------------------------------------------------------------------------------------------------------------------------------------------------------------------------------------------------------------------------------------------------------------------------------------------------------------------------------------------------|
| Protein kinase inhibitors | <p>imatinib, gefitinib, erlotinib, sunitinib, sorafenib, dasatinib, lapatinib, nilotinib, temsirolimus, everolimus, pazopanib, vandetanib, afatinib, bosutinib, vemurafenib, crizotinib, axitinib, ruxolitinib, ridaforolimus, regorafenib, masitinib, dabrafenib, ponatinib, trametinib, cabozantinib, ibrutinib, ceritinib, lenvatinib, nintedanib, cediranib, palbociclib, tivozanib, osimertinib, alectinib, rociletinib, cobimetinib, midostaurin, olmutinib, binimetinib, ribociclib, brigatinib, lorlatinib, neratinib, encorafenib, dacomitinib, icotinib, abemaciclib, acalabrutinib, quizartinib, larotrectinib, gilteritinib, entrectinib, fedratinib, toceranib</p>                                                                                                                                                                                                                                                                                                                                                                                                                                                                                                                                                                                                                                                                                                                                                                                                                                                                                                                                                                                                                                                                                                                                                                                                                                                                                                                                                             |
| Other cancer therapies    | <p>chlorambucil, melphalan, chlormethine, ifosfamide, trofosfamide, prednimustine, bendamustine, busulfan, treosulfan, mannosulfan, thiotepa, triaziquone, carboquone, carmustine, lomustine, semustine, streptozocin, fotemustine, nimustine, ranimustine, uramustine, etoglucid, itobronitol, pipobroman, temozolomide, dacarbazine, methotrexate, raltitrexed, pemetrexed, pralatrexate, mercaptopurine, tioguanine, cladribine, fludarabine, clofarabine, nelarabine, rabacfosadine, cytarabine, fluorouracil, tegafur, carmofur, gemcitabine, capecitabine, azacitidine, decitabine, floxuridine, fluorouracil, tegafur, trifluridine, vinblastine, vincristine, vindesine, vinorelbine, vinflunine, vintafolide, etoposide, teniposide, demecolcine, paclitaxel, docetaxel, paclitaxel poliglumex, cabazitaxel, trabectedin, dactinomycin, bleomycin, plicamycin, mitomycin, ixabepilone, cisplatin, carboplatin, oxaliplatin, satraplatin, polyplatillen, procarbazine, porfimer sodium, methyl aminolevulinate, aminolevulinic acid, temoporfin, efaproxiral, padeliporfin, amsacrine, asparaginase, altretamine, hydroxycarbamide, lonidamine, pentostatin, masoprocol, estramustine, mitoguazone, topotecan, tiazofurine, irinotecan, alitretinoin, mitotane, pegaspargase, bexarotene, arsenic trioxide, denileukin diftitox, bortezomib, anagrelide, oblimersen, sitimagene ceradenovec, vorinostat, romidepsin, omacetaxine mepesuccinate, eribulin, panobinostat, vismodegib, aflibercept, carfilzomib, olaparib, idelalisib, sonidegib, belinostat, ixazomib, talimogene laherparepvec, venetoclax, vosaroxin, niraparib, rucaparib, etirinotecan pegol, plitidepsin, epacadostat, enasidenib, talazoparib, copanlisib, ivosidenib, glasdegib, entinostat, alpelisib, selinexor, tagraxofusp, belotecan, tigilanol tiglate, cytarabine</p> <p>Defined using WHO Anatomical Therapeutic Chemistry Class L01 products that were not anthracyclines, checkpoint inhibitors, cyclophosphamide, or protein kinase inhibitors.</p> |
| Rituximab                 | rituximab                                                                                                                                                                                                                                                                                                                                                                                                                                                                                                                                                                                                                                                                                                                                                                                                                                                                                                                                                                                                                                                                                                                                                                                                                                                                                                                                                                                                                                                                                                                                                                                                                                                                                                                                                                                                                                                                                                                                                                                                                                   |

Appendix: Use of Chronic Immunosuppressive Medicines and In-Hospital COVID-19 Outcomes:  
A Retrospective Cohort Study Using the National COVID Cohort Collaborative (N3C)

---

Targeted cancer therapies      edrecolomab, trastuzumab, gemtuzumab ozogamicin, cetuximab, bevacizumab, panitumumab, catumaxomab, ofatumumab, brentuximab vedotin, pertuzumab, trastuzumab emtansine, obinutuzumab, dinutuximab beta, blinatumomab, ramucirumab, necitumumab, elotuzumab, daratumumab, mogamulizumab, inotuzumab ozogamicin, olaratumab, bermekimab

Defined using monoclonal antibody products in WHO Anatomical Therapeutic Chemistry Class L04 products that were not interleukin, tumor necrosis factor alpha or janus kinase inhibitors.

---

Oral glucocorticoids      dexamethasone, prednisone, prednisolone, methylprednisolone

---

**eTable 2. Definitions for Variables Included in Propensity Score.**

|                                                                                                      |                                                                                                                                                                                                                                                                                               |
|------------------------------------------------------------------------------------------------------|-----------------------------------------------------------------------------------------------------------------------------------------------------------------------------------------------------------------------------------------------------------------------------------------------|
| Week of admission                                                                                    |                                                                                                                                                                                                                                                                                               |
| Contributing data site                                                                               |                                                                                                                                                                                                                                                                                               |
| Age at admission                                                                                     |                                                                                                                                                                                                                                                                                               |
| Sex                                                                                                  | As recorded in local electronic health record                                                                                                                                                                                                                                                 |
| Race and ethnicity                                                                                   | Often, self-reported. Operationalized using Census Tract designations of Asian, Hispanic or Latinx, non-Hispanic Black, non-Hispanic white, Another race or missing.                                                                                                                          |
| Smoking history                                                                                      | Current or former smoker                                                                                                                                                                                                                                                                      |
| Body mass index                                                                                      | We used WHO cutpoints to categorize the body mass index (BMI) as underweight, normal weight, overweight, obese or missing. We took the measure closest to the date of, and considered improbable values, which we defined as $< 15 \text{ kg/m}^2$ or $>70 \text{ kg/m}^2$ , as missing data. |
| Days between COVID-19 diagnosis and hospital admission                                               |                                                                                                                                                                                                                                                                                               |
| Cardiovascular disease                                                                               | ICD-10 codes I25.x                                                                                                                                                                                                                                                                            |
| Chronic hypertension                                                                                 | ICD-10 codes I10.x                                                                                                                                                                                                                                                                            |
| Medications current at the time of admission used to treat risk factors for severe COVID-19 outcomes |                                                                                                                                                                                                                                                                                               |
| Congestive heart failure                                                                             | potassium canrenoate, canrenone, eplerenone, metoprolol, sacubitril with valsartan, spironolactone or digoxin                                                                                                                                                                                 |

Appendix: Use of Chronic Immunosuppressive Medicines and In-Hospital COVID-19 Outcomes: A Retrospective Cohort Study Using the National COVID Cohort Collaborative (N3C)

---

|          |                                                                                                                                                                                                                                                                                                                                                                                                                                                                                                                                                                                                                                                                                                                                                                                                                                                                                                                                                                                                                                                                                 |
|----------|---------------------------------------------------------------------------------------------------------------------------------------------------------------------------------------------------------------------------------------------------------------------------------------------------------------------------------------------------------------------------------------------------------------------------------------------------------------------------------------------------------------------------------------------------------------------------------------------------------------------------------------------------------------------------------------------------------------------------------------------------------------------------------------------------------------------------------------------------------------------------------------------------------------------------------------------------------------------------------------------------------------------------------------------------------------------------------|
| Diabetes | One variable for each of<br><br>Biguanides (WHO ATC A10BA): phenformin, metformin, buformin<br>Alpha glucosidase inhibitors (WHO ATC A10BF): acarbose, miglitol, voglibose<br>Sulfonylureas (WHO ATC A10BB and A10BC): glibenclamide, chlorpropamide, tolbutamide, glibornuride, tolazamide, carbutamide, glipizide, gliquidone, gliclazide, metahexamide, glisoxepide, glimepiride, acetohexamide, glymidine<br>Thiazolidinediones (WHO ATC A10BG): troglitazone, rosiglitazone, pioglitazone<br>Dipeptidyl peptidase-4 inhibitors (WHO ATC A10BH): sitagliptin, vildagliptin, saxagliptin, alogliptin, linagliptin, gemigliptin, evogliptin<br>Glucagon-like peptide-1 agonists (WHO ATC A10BJ): exenatide, liraglutide, lixisenatide, albiglutide, dulaglutide, semaglutide<br>Sodium-glucose transport protein-2 inhibitors (WHO ATC A10BK): dapagliflozin, canagliflozin, empagliflozin, ertugliflozin, ipragliflozin, sotagliflozin<br>Other oral antidiabetic drugs (WHO ATC A10BX): guar gum, repaglinide, nateglinide, pramlintide, benfluorex, mitiglinide<br>Insulin |
| Dementia | (WHO ATC N06D) donepezil, galantamine, rivastigmine or memantine                                                                                                                                                                                                                                                                                                                                                                                                                                                                                                                                                                                                                                                                                                                                                                                                                                                                                                                                                                                                                |

---

Appendix: Use of Chronic Immunosuppressive Medicines and In-Hospital COVID-19 Outcomes: A Retrospective Cohort Study Using the National COVID Cohort Collaborative (N3C)

---

|                     |                                                                                                                                                                                                                                                                                                                                                                                                                                                                                                                                                                                                                                                                                                                                                                                                                                                                                                                                                                                                                                                                                                                                                                                                                                                                        |
|---------------------|------------------------------------------------------------------------------------------------------------------------------------------------------------------------------------------------------------------------------------------------------------------------------------------------------------------------------------------------------------------------------------------------------------------------------------------------------------------------------------------------------------------------------------------------------------------------------------------------------------------------------------------------------------------------------------------------------------------------------------------------------------------------------------------------------------------------------------------------------------------------------------------------------------------------------------------------------------------------------------------------------------------------------------------------------------------------------------------------------------------------------------------------------------------------------------------------------------------------------------------------------------------------|
| Pulmonary disorders | <p>One variable for each of</p> <p>Short acting beta agonists (WHO ATC R03CC): salbutamol, terbutaline, fenoterol, hexoprenaline, isoetarine, pirbuterol, procaterol, tretoquinol, carbuterol, tulobuterol, bambuterol, clenbuterol</p> <p>Long acting beta agonists (WHO ATC R03AC): bambuterol, clenbuterol, formoterol, indacaterol, olodaterol, salmeterol</p> <p>Inhaled corticosteroids (WHO ATC R03BA): beclometasone, budesonide, flunisolide, betamethasone valerate, fluticasone, triamcinolone acetonide, mometasone, ciclesonide, fluticasone furoate</p> <p>Leukotriene modifiers (WHO ATC R03DC): zafirlukast, pranlukast, montelukast</p> <p>Other drugs for pulmonary disorders (WHO ATC R03): hexoprenaline, tretoquinol, clenbuterol, ipratropium bromide, oxitropium bromide, stramoni, tiotropium bromide, acridinium bromide, glycopyrronium bromide, umeclidinium bromide, revefenacin, cromoglicic acid, nedocromil, fenspiride, isoprenaline, methoxyphenamine, orciprenaline, fenoterol, hexoprenaline, tretoquinol, reproterol, diprophylline, choline theophyllinate, proxyphylline, theophylline, aminophylline, etamiphylline, theobromine, bamifylline, acefylline piperazine, bufylline, doxofylline, mepyramine theophyllinacetate</p> |
| Obesity             | <p>Orlistat, lorcaserin, phentermine, bupropion with naltrexone, liraglutide</p>                                                                                                                                                                                                                                                                                                                                                                                                                                                                                                                                                                                                                                                                                                                                                                                                                                                                                                                                                                                                                                                                                                                                                                                       |
| Renal disease       | <p>(WHO ATC B03XA, A11CC and V03AE) Erythropoietin, darbepoetin alfa, methoxy polyethylene glycol-epoetin beta, ergocalciferol, dihydrotachysterol, alfacalcidol, calcitriol, sevelamer, lanthanum carbonate, or sucroferric oxyhydroxide</p>                                                                                                                                                                                                                                                                                                                                                                                                                                                                                                                                                                                                                                                                                                                                                                                                                                                                                                                                                                                                                          |

---



Appendix: Use of Chronic Immunosuppressive Medicines and In-Hospital COVID-19 Outcomes: A Retrospective Cohort Study Using the National COVID Cohort Collaborative (N3C)

---

Comorbidities present at admission      Defined using the conditions included in the Charlson Comorbidity Index, using all-available lookback data in the N3C Enclave, which can be as far as January 1, 2018. We used the standard N3C definitions for all conditions, except for HIV where we used the Immunosuppressed Domain Team's definition.

- Cancer: code set 535274723
- Congestive heart failure: 359043664
- Dementia: 78746470
- Diabetes: 719585646
- Diabetes with complications: 403438288
- HIV infection: 382527336
- Liver disease, mild: 494981955
- Liver disease, severe: 248333963
- Metastatic cancer: 378462283
- Myocardial infarction: 259495957
- Paralysis: 489555336
- Peptic ulcer disease: 510748896
- Pulmonary disorder: 514953976
- Peripheral vascular disease: 376881697
- Renal disease: 220495690
- Rheumatic disease: 765004404
- Stroke: 652711186

---

History of solid organ transplant      Kidney (N3C Enclave code set ID 913892613), liver (204996696), heart (976928531) or lung (335991647). Other less common organ transplants, such as pancreas, were explored but sample size limitations precluded further use.

---

Drugs were defined using WHO Anatomical Therapeutic Chemical (WHO ATC) class, and diagnoses were defined using ICD-10 codes.

**eTable 3. Frequency of Immunosuppressive Drug Classes in Cohort.**

|                                                     | Number of people among the immunosuppressed group (n = 16,494) with drug class current at the time of admission |
|-----------------------------------------------------|-----------------------------------------------------------------------------------------------------------------|
| Rheumatologic drugs                                 | 5,366 (33%)                                                                                                     |
| Glucocorticoid with rheumatological condition       | 4,281 (26%)                                                                                                     |
| Interleukin inhibitors                              | 377 (2%)                                                                                                        |
| Janus kinase inhibitors                             | 85 (1%)                                                                                                         |
| Rituximab with rheumatological condition            | 132 (1%)                                                                                                        |
| Tumor necrosis factor alpha inhibitors              | 343 (2%)                                                                                                        |
| Other selective immunosuppressants                  | 994 (6%)                                                                                                        |
| Antimetabolite drugs                                | 4,288 (26%)                                                                                                     |
| Azathioprine                                        | 436 (3%)                                                                                                        |
| Calcineurin inhibitors                              | 3,403 (21%)                                                                                                     |
| Mycophenolic acid                                   | 2,788 (17%)                                                                                                     |
| Glucocorticoids with solid organ transplant         | 2,598 (16%)                                                                                                     |
| Cancer therapies                                    | 3,569 (22%)                                                                                                     |
| Cyclophosphamide                                    | 280 (2%)                                                                                                        |
| Anthracyclines                                      | 328 (2%)                                                                                                        |
| Checkpoint inhibitors                               | 159 (1%)                                                                                                        |
| Protein kinase inhibitors                           | 582 (4%)                                                                                                        |
| Other cancer therapies                              | 2,633 (16%)                                                                                                     |
| Targeted cancer therapies                           | 343 (2%)                                                                                                        |
| Rituximab with cancer                               | 186 (1%)                                                                                                        |
| Rituximab without rheumatologic or cancer diagnosis | 84 (< 1%)                                                                                                       |
| Glucocorticoid for chronic pulmonary disease        | 6,828 (42%)                                                                                                     |

People can be on more than one immunosuppressive drug at a time. Drug categories are defined in eTable 2.

**eTable 4. Prevalence of 17 Comorbidities Among Adults Hospitalized with COVID-19.**

|                             | Immunosuppressed<br>N = 16,494 | Non-immunosuppressed<br>N = 206,081 | SMD  |
|-----------------------------|--------------------------------|-------------------------------------|------|
| Acute myocardial infarction | 2,382 (14%)                    | 9,030 (4%)                          | 0.35 |
| Congestive heart failure    | 4,915 (30%)                    | 20,510 (10%)                        | 0.51 |
| Peripheral vascular disease | 3,783 (23%)                    | 15,852 (8%)                         | 0.43 |
| Cerebral vascular accident  | 3,226 (20%)                    | 15,695 (8%)                         | 0.35 |
| Dementia                    | 827 (5%)                       | 8,426 (4%)                          | 0.04 |
| Pulmonary disease           | 8,646 (52%)                    | 28,114 (14%)                        | 0.91 |
| Connective tissue disorder  | 2,827 (17%)                    | 5,975 (3%)                          | 0.49 |
| Peptic ulcer disease        | 785 (5%)                       | 2,370 (1%)                          | 0.21 |
| Liver disease               | 3,059 (19%)                    | 10,229 (5%)                         | 0.43 |
| Diabetes                    | 7,728 (47%)                    | 42,928 (21%)                        | 0.57 |
| Diabetes complications      | 4,569 (28%)                    | 19,305 (9%)                         | 0.49 |
| Paralysis                   | 580 (4%)                       | 2,636 (1%)                          | 0.15 |
| Renal disease               | 6,397 (39%)                    | 23,375 (11%)                        | 0.67 |
| Cancer                      | 4,465 (27%)                    | 14,168 (7%)                         | 0.56 |
| Metastatic cancer           | 1,363 (8%)                     | 2,392 (1%)                          | 0.34 |
| Severe liver disease        | 743 (5%)                       | 2,014 (1%)                          | 0.22 |
| HIV                         | 210 (1%)                       | 1,162 (1%)                          | 0.07 |

SMD: standardized mean difference, represented as the absolute value.

**eTable 5. Laboratory Measures and Vital Signs on Day of Admission, Before and After Propensity Score Matching.**

|                                                    | Before Propensity Score Matching |                      |      | After Propensity Score Matching |                      |      |
|----------------------------------------------------|----------------------------------|----------------------|------|---------------------------------|----------------------|------|
|                                                    | Immunosuppressed                 | Non-immunosuppressed | SMD  | Immunosuppressed                | Non-immunosuppressed | SMD  |
| Abnormal vital signs in first admitted day         |                                  |                      |      |                                 |                      |      |
| Fever                                              | 537 (8%)                         | 5,672 (10%)          | 0.04 | 424 (9%)                        | 1,040 (9%)           | 0.01 |
| Low mean arterial pressure                         | 22 (1%)                          | 157 (< 1%)           | 0.02 | Fewer than 20 (1%)              | 35 (< 1%)            | 0.01 |
| High mean arterial pressure                        | 1,065 (25%)                      | 11,017 (29%)         | 0.08 | 814 (25%)                       | 1,962 (26%)          | 0.01 |
| Low oxygen saturation                              | 968 (14%)                        | 8,932 (16%)          | 0.05 | 749 (14%)                       | 2,077 (16%)          | 0.06 |
| Rapid pulse                                        | 1,290 (25%)                      | 10,310 (25%)         | 0.00 | 1,039 (26%)                     | 2,230 (23%)          | 0.05 |
| Rapid breathing                                    | 1,610 (26%)                      | 14,851 (27%)         | 0.02 | 1,279 (26%)                     | 3,283 (27%)          | 0.03 |
| Abnormal laboratory measures in first admitted day |                                  |                      |      |                                 |                      |      |
| ↓ Albumin                                          | 2,930 (37%)                      | 35,951 (42%)         | 0.10 | 2,280 (37%)                     | 5,608 (39%)          | 0.05 |
| ↑ ALT                                              | 2,122 (26%)                      | 32,840 (39%)         | 0.29 | 1,721 (27%)                     | 4,614 (31%)          | 0.09 |
| ↑ AST                                              | 3,868 (39%)                      | 50,172 (52%)         | 0.26 | 3,065 (40%)                     | 7,589 (45%)          | 0.11 |
| ↑ C-reactive protein                               | 2,837 (90%)                      | 30,691 (92%)         | 0.10 | 2,243 (90%)                     | 5,341 (91%)          | 0.05 |
| ↑ Creatinine                                       | 3,620 (37%)                      | 26,528 (25%)         | 0.26 | 2,514 (33%)                     | 5,698 (32%)          | 0.02 |
| ↑ Troponin                                         | 2,756 (71%)                      | 22,921 (62%)         | 0.20 | 2,109 (69%)                     | 5,006 (68%)          | 0.04 |
| ↑ White blood cells                                | 1,563 (16%)                      | 10,242 (10%)         | 0.20 | 1,148 (15%)                     | 1,904 (11%)          | 0.13 |
| ↓ White blood cells                                | 1,479 (15%)                      | 19,763 (19%)         | 0.09 | 1,203 (16%)                     | 3,115 (18%)          | 0.04 |

ALT: alanine aminotransferase; AST: aspartate aminotransferase; SMD: standardized mean difference, represented as the absolute value. Vital signs and lab values in the table represent individuals with abnormal values above or below referent standard, and the denominator for the proportions exclude persons missing a result. We defined abnormal vital signs within 24 hours of admission (body temperature >38°C, mean arterial pressure < 60mmHg or >100mmHg, oxygen saturation from pulse oximetry < 93%, pulse >99 beats per minute, respiratory rate >22 breaths per minute) and abnormal lab results within 24 hours of admission (albumin < 3.5 g/dL, alanine aminotransferase (ALT) > 35 u/L, C-reactive protein > 8 mg/L, creatinine > 1.3 mg/dL, detectable troponin, white blood cell count < 4 cells per 10<sup>3</sup>/uL or > 11 cells per 10<sup>3</sup>/uL).<sup>25</sup>

**eTable 6. E-Values for Strength of Association Between Immunosuppressive Medication Classes and Clinical Outcomes in COVID.**

|                                               | E-value                         |                   |
|-----------------------------------------------|---------------------------------|-------------------|
|                                               | Invasive Mechanical Ventilation | In-Hospital Death |
| Rheumatologic drugs                           | 2.26                            | 1.11              |
| Glucocorticoid with rheumatological condition | 1.63                            | 1.25              |
| Interleukin inhibitors                        | 2.30                            | 2.00              |
| Janus kinase inhibitors                       | 2.78                            | 4.19              |
| Rituximab with rheumatological condition      | 2.37                            | 2.83              |
| Tumor necrosis factor alpha inhibitors        | 2.04                            | 1.16              |
| Other selective immunosuppressants            | 2.08                            | 1.46              |
| Antimetabolite drugs                          | 1.85                            | 1.25              |
| Azathioprine                                  | 2.50                            | 2.12              |
| Calcineurin inhibitors                        | 2.40                            | 1.32              |
| Mycophenolic acid                             | 1.67                            | 1.39              |
| Glucocorticoids with solid organ transplant   | 2.66                            | 1.29              |
| Cancer therapies                              | 2.08                            | 1.16              |
| Cyclophosphamide                              | 2.08                            | 1.97              |
| Anthracyclines                                | 3.18                            | 1.69              |
| Checkpoint inhibitors                         | 2.08                            | 2.39              |
| Protein kinase inhibitors                     | 2.17                            | 1.60              |
| Other cancer therapies                        | 1.50                            | 4.58              |
| Targeted cancer therapies                     | 2.30                            | 1.46              |
| Rituximab with cancer                         | 2.00                            | 1.31              |

The e-value is calculated as  $HR + \sqrt{HR \times (HR - 1)}$ , where HR = hazard ratio. In cases where the hazard ratio was less than 1, the inverse of the hazard ratio is used to calculate the e-value.

**eTable 7. Hazard ratios and 95% confidence intervals for the association between long-term immunosuppression and invasive mechanical ventilation, by medication class**

|                                               | Hazard Ratio (95% Confidence Interval)<br>Comparing Immunosuppressed to Non-<br>Immunosuppressed Persons |
|-----------------------------------------------|----------------------------------------------------------------------------------------------------------|
| Rheumatologic drugs                           | <b>0.69 (0.57-0.84)</b>                                                                                  |
| Glucocorticoid with rheumatological condition | <b>0.85 (0.75-0.97)</b>                                                                                  |
| Interleukin inhibitors                        | 0.68 (0.45-1.02)                                                                                         |
| Janus kinase inhibitors                       | 0.59 (0.19-1.86)                                                                                         |
| Rituximab with rheumatological condition      | 1.50 (0.85-2.64)                                                                                         |
| Tumor necrosis factor alpha inhibitors        | 0.74 (0.47-1.18)                                                                                         |
| Other selective immunosuppressants            | <b>0.73 (0.57-0.93)</b>                                                                                  |
| Antimetabolite drugs                          | <b>0.79 (0.68-0.92)</b>                                                                                  |
| Azathioprine                                  | <b>0.64 (0.43-0.95)</b>                                                                                  |
| Calcineurin inhibitors                        | <b>0.66 (0.55-0.78)</b>                                                                                  |
| Mycophenolic acid                             | 0.84 (0.70-1.008)                                                                                        |
| Glucocorticoids with solid organ transplant   | <b>0.61 (0.49-0.77)</b>                                                                                  |
| Cancer therapies                              | <b>0.73 (0.63-0.85)</b>                                                                                  |
| Cyclophosphamide                              | <b>0.53 (0.31-0.89)</b>                                                                                  |
| Anthracycline                                 | 0.73 (0.47-1.14)                                                                                         |
| Checkpoint inhibitor                          | 0.73 (0.33-1.61)                                                                                         |
| Protein kinase inhibitors                     | <b>0.71 (0.51-0.994)</b>                                                                                 |
| Other antineoplastics                         | <b>0.75 (0.63-0.88)</b>                                                                                  |
| Targeted cancer therapies                     | 0.68 (0.43-1.06)                                                                                         |
| Rituximab with cancer                         | 0.89 (0.51-1.58)                                                                                         |

**eTable 8. Hazard ratios and 95% confidence intervals for the association between long-term immunosuppression and in-hospital death, by medication class**

|                                               | Hazard Ratio (95% Confidence Interval)<br>Comparing Immunosuppressed to Non-<br>Immunosuppressed Persons |
|-----------------------------------------------|----------------------------------------------------------------------------------------------------------|
| Rheumatologic drugs                           | 1.01 (0.86-1.20)                                                                                         |
| Glucocorticoid with rheumatological condition | 0.96 (0.86-1.07)                                                                                         |
| Interleukin inhibitors                        | 0.75 (0.48-1.17)                                                                                         |
| Janus kinase inhibitors                       | <b>0.42 (0.24-0.73)</b>                                                                                  |
| Rituximab with rheumatological condition      | <b>1.72 (1.10-2.69)</b>                                                                                  |
| Tumor necrosis factor alpha inhibitors        | 1.02 (0.61-1.69)                                                                                         |
| Other selective immunosuppressants            | 1.11 (0.92-1.35)                                                                                         |
| Antimetabolite drugs                          | 0.96 (0.83-1.10)                                                                                         |
| Azathioprine                                  | 0.72 (0.48-1.08)                                                                                         |
| Calcineurin inhibitors                        | 0.94 (0.79-1.11)                                                                                         |
| Mycophenolic acid                             | 0.92 (0.75-1.12)                                                                                         |
| Glucocorticoids with solid organ transplant   | 0.95 (0.74-1.22)                                                                                         |
| Cancer therapies                              | 1.02 (0.93-1.11)                                                                                         |
| Cyclophosphamide                              | 1.20 (0.77-1.88)                                                                                         |
| Anthracycline                                 | 1.51 (0.989-2.30)                                                                                        |
| Checkpoint inhibitor                          | 1.33 (0.82-2.15)                                                                                         |
| Protein kinase inhibitors                     | 0.86 (0.68-1.09)                                                                                         |
| Other antineoplastics                         | 1.06 (0.95-1.18)                                                                                         |
| Targeted cancer therapies                     | 1.11 (0.81-1.52)                                                                                         |
| Rituximab with cancer                         | <b>2.57 (1.86-3.56)</b>                                                                                  |

Appendix: Use of Chronic Immunosuppressive Medicines and In-Hospital COVID-19 Outcomes: A Retrospective Cohort Study Using the National COVID Cohort Collaborative (N3C)

**eTable 9. Results from Sensitivity Analyses.**

|                                                                                                                    | Invasive Mechanical Ventilation <sup>1</sup> | In-Hospital Death |
|--------------------------------------------------------------------------------------------------------------------|----------------------------------------------|-------------------|
| Restricting glucocorticoid definition to persons with dose information available                                   | <b>0.79 (0.69-0.89)</b>                      | 1.06 (0.95-1.17)  |
| Restricting Cohort to Persons With At Least 1 Prior Encounter With Health System Prior to COVID-19 Hospitalization | 0.93 (0.86-1.000)                            | 0.97 (0.91-1.03)  |
| Restricting Cohort to Persons With Minimum 2 Days Length of Stay                                                   | <b>0.89 (0.83-0.96)</b>                      | 0.97 (0.91-1.03)  |
| Adding Laboratory Measures and Vitals Signs from Day of Admission                                                  | 0.96 (0.89-1.03)                             | 0.96 (0.90-1.01)  |
| Varying Ventilation Onset Definition to latest date in range <sup>1</sup>                                          | <b>0.86 (0.80-0.92)</b>                      | --                |

<sup>1</sup> For 4% of the cohort, their first code indicating invasive ventilation indicated ventilation placement in the range of 24-96 hours prior. For these people, in this sensitivity analysis, we used 96 hours. For 7% of the cohort, the first code indicating invasive ventilation had been placed “greater than 96 hours”. For these people, in this sensitivity analysis, we used the date of admission as the earliest possible date at risk.



**eTable 10. Association Between Chronic Immunosuppression and Clinical Outcomes in COVID, for Race and Ethnicity Groups.**

|                         | Hazard Ratio (95% Confidence Interval)<br>Comparing Immunosuppressed to Non-Immunosuppressed<br>Persons |                   |
|-------------------------|---------------------------------------------------------------------------------------------------------|-------------------|
|                         | Invasive Mechanical Ventilation                                                                         | In-Hospital Death |
| Asian                   | 0.72 (0.42-1.24)                                                                                        | 0.65 (0.36-1.20)  |
| Hispanic or Latinx      | 0.95 (0.77-1.18)                                                                                        | 1.10 (0.90-1.34)  |
| Non-Hispanic Black      | <b>0.82 (0.70-0.95)</b>                                                                                 | 0.88 (0.76-1.02)  |
| Non-Hispanic white      | 0.90 (0.82-1.000)                                                                                       | 0.97 (0.90-1.04)  |
| Another race*           | 1.29 (0.45-3.73)                                                                                        | 1.28 (0.56-2.91)  |
| Missing or unknown race | <b>0.68 (0.55-0.84)</b>                                                                                 | 1.02 (0.86-1.21)  |

\*We created the category of "Another race" due to sample size limitations. The category includes American Indian or Alaska Native, Native Hawaiian or Other Pacific Islander, and Other.

**eFigure 1. Analytic Cohort Derivation.**

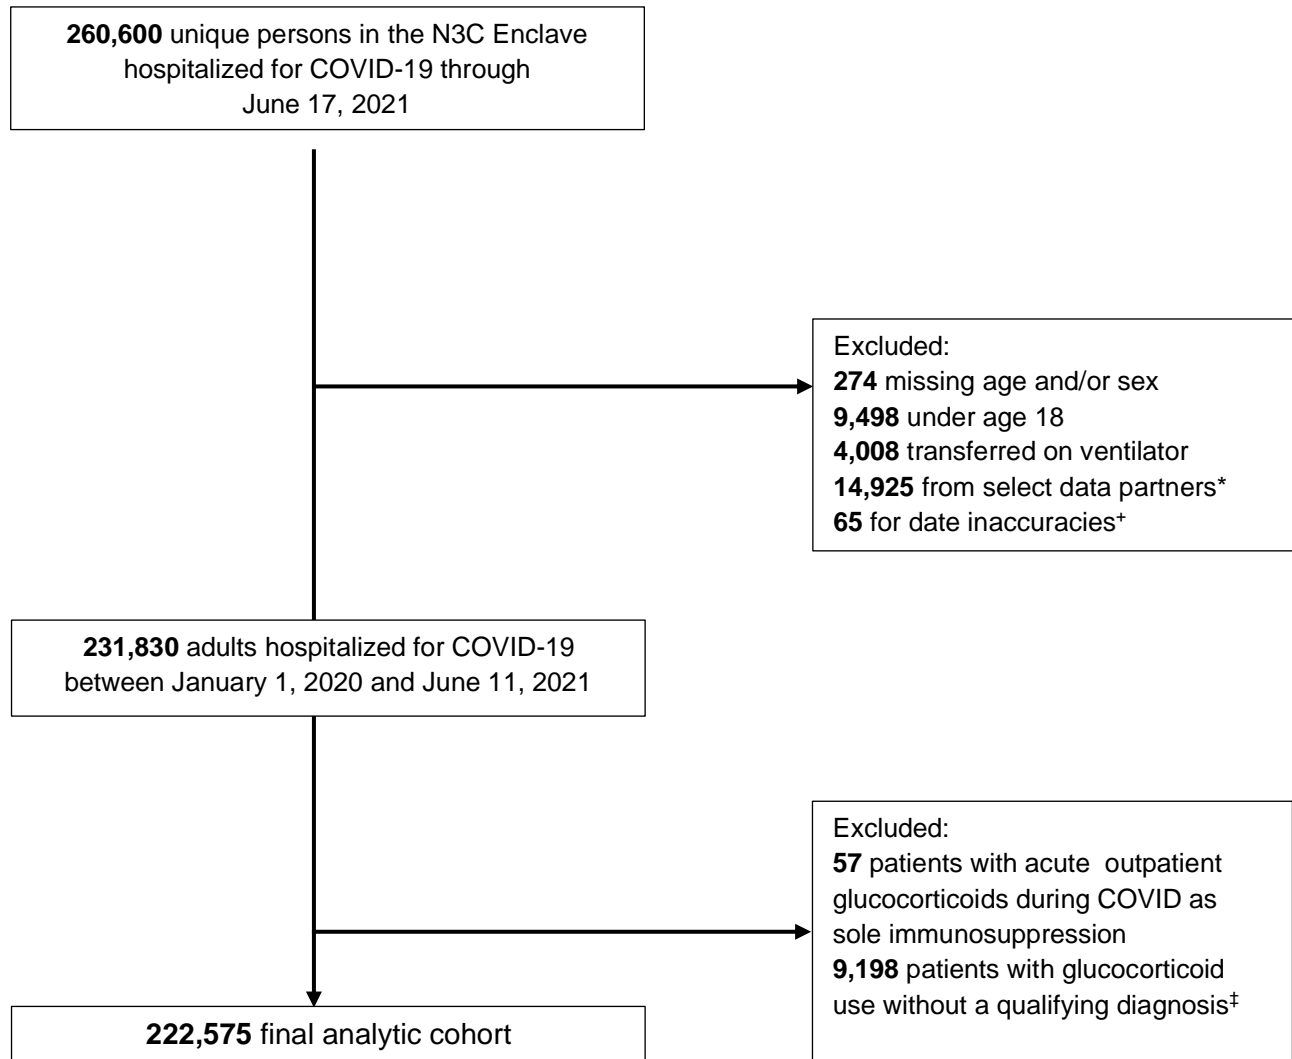

**N3C:** National COVID Cohort Collaborative.

\* In accordance with N3C data quality procedures, we excluded six data partner sites: one with overall data quality concerns, one that shifted dates by up to 90 days before sending data to the N3C, three sites with over 100 hospitalized COVID-positive adults yet zero recorded deaths, and one site with over 100 COVID-positive adults yet zero recorded as receiving invasive mechanical ventilation.

† Date inaccuracies included persons with a date of COVID diagnosis before January 1, 2020, a date of death before January 1, 2020, or a date of death that preceded date of admission.

‡ Diagnoses that would suggest chronic glucocorticoid use were psoriasis, ulcerative colitis, rheumatoid arthritis, chronic obstructive pulmonary disease, asthma, systemic lupus erythematosus, vasculitis, ankylosing spondylitis, axial spondyloarthritis, psoriatic arthritis, or a history of solid organ transplantation.

**eFigure 2. Weekly Volume of Admissions in the N3C, March 18, 2020 through June 2, 2021.**

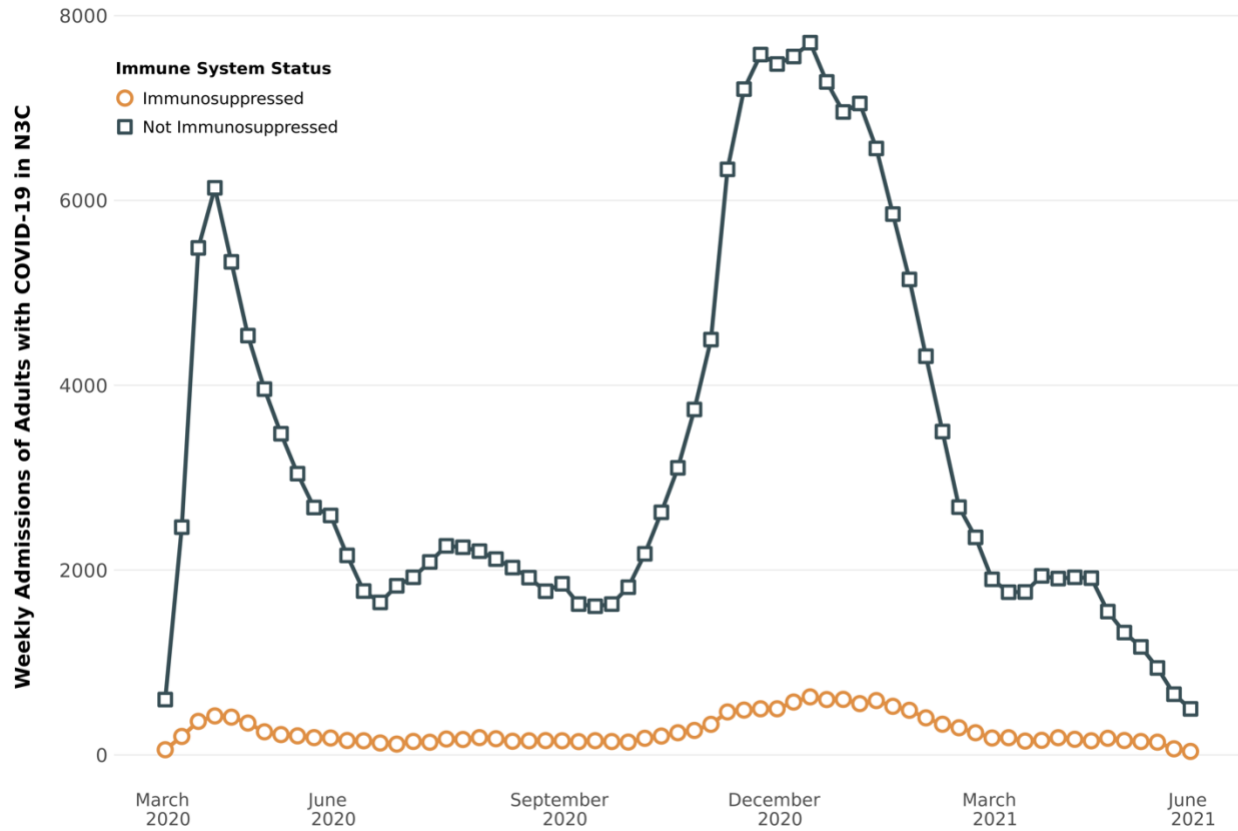

As per N3C data policies, data are suppressed for weeks before March 18, 2020 and after June 2, 2021, as at least one group had 20 or fewer people.

Appendix: Use of Chronic Immunosuppressive Medicines and In-Hospital COVID-19 Outcomes: A Retrospective Cohort Study Using the National COVID Cohort Collaborative (N3C)

**eFigure 3. Covariate Balance Before and After Propensity Score Matching.**

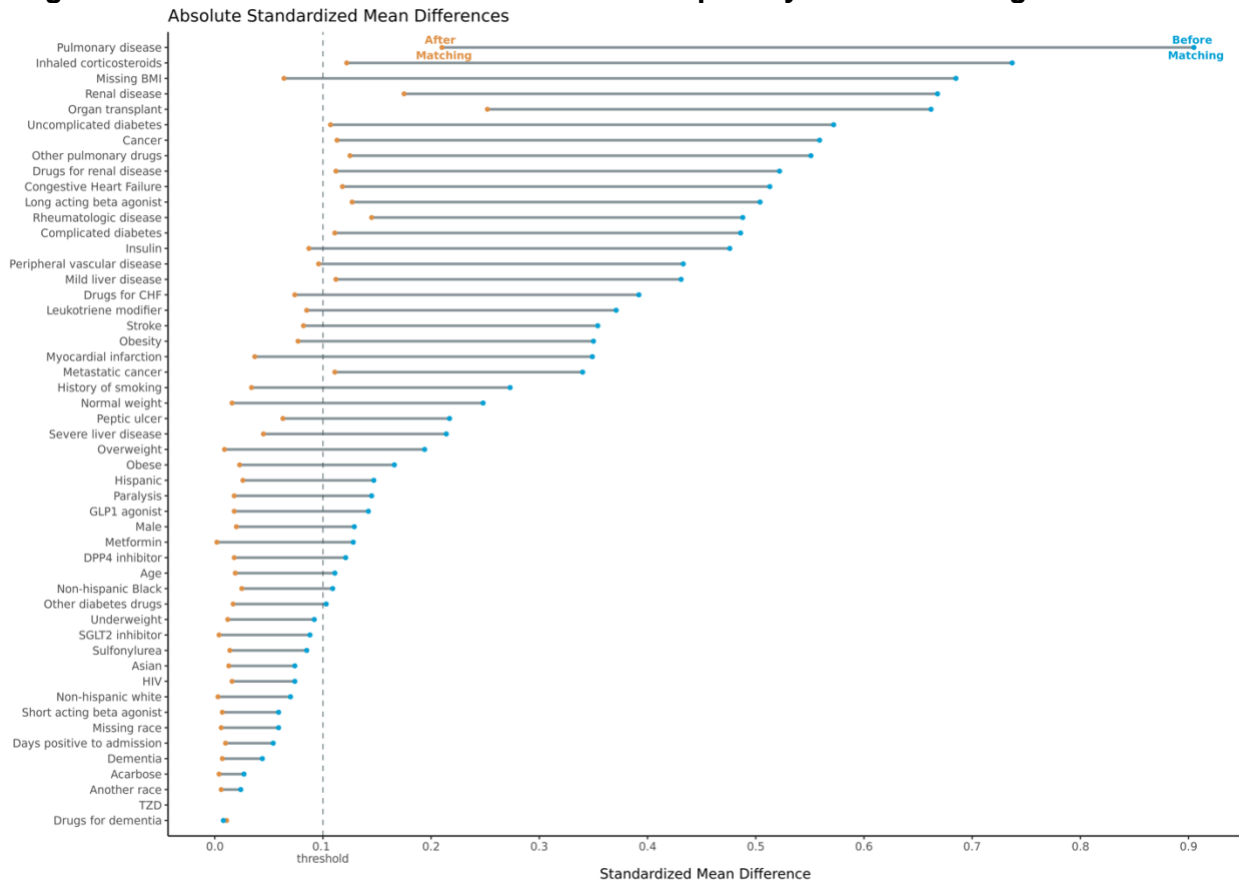

**eFigure 4. Propensity Score Distribution Before and After Matching.**

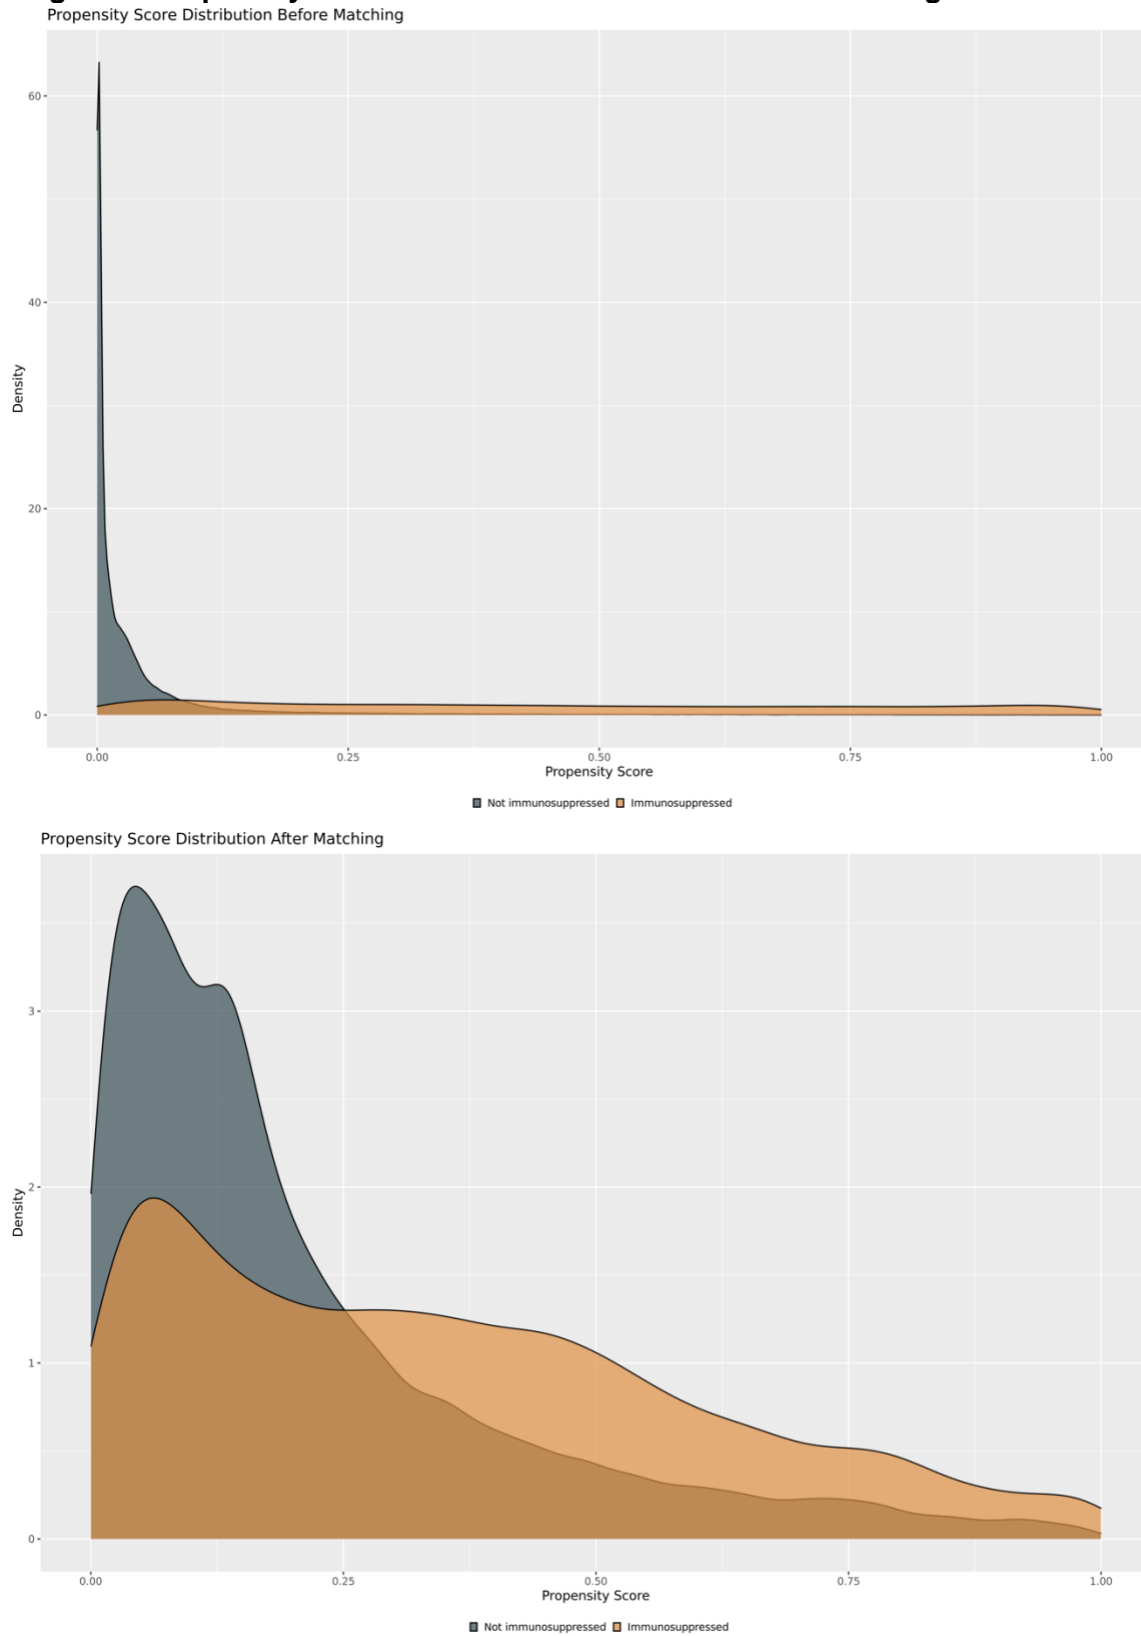

**eFigure 5. Weekly Percentage of Hospitalized Adults with Invasive Mechanical Ventilation, by Immune System Status.**

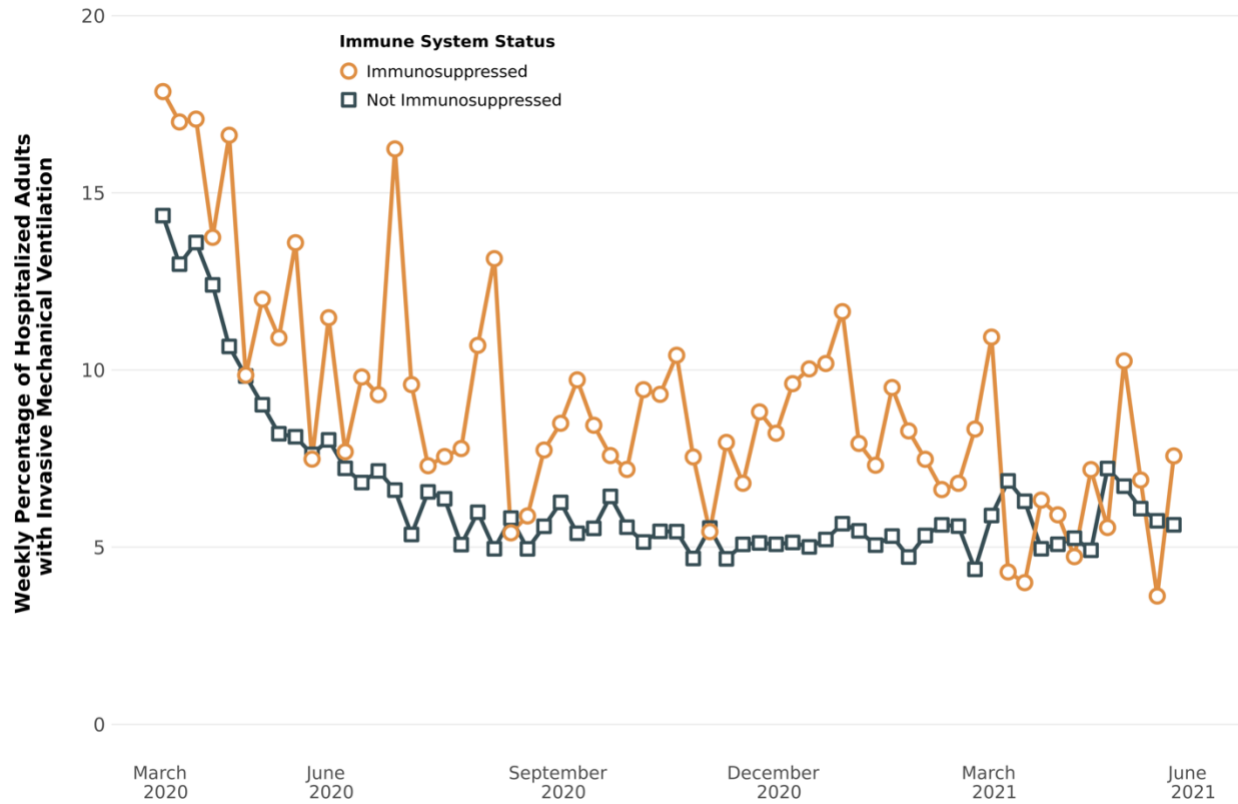

This graph does not present data before March 18, 2020 and after June 2, 2021, where the small number of people at risk may not accurately reflect patterns.

**eFigure 6. Weekly Percentage of Hospitalized Adults Dying with COVID-19, by Immune System Status.**

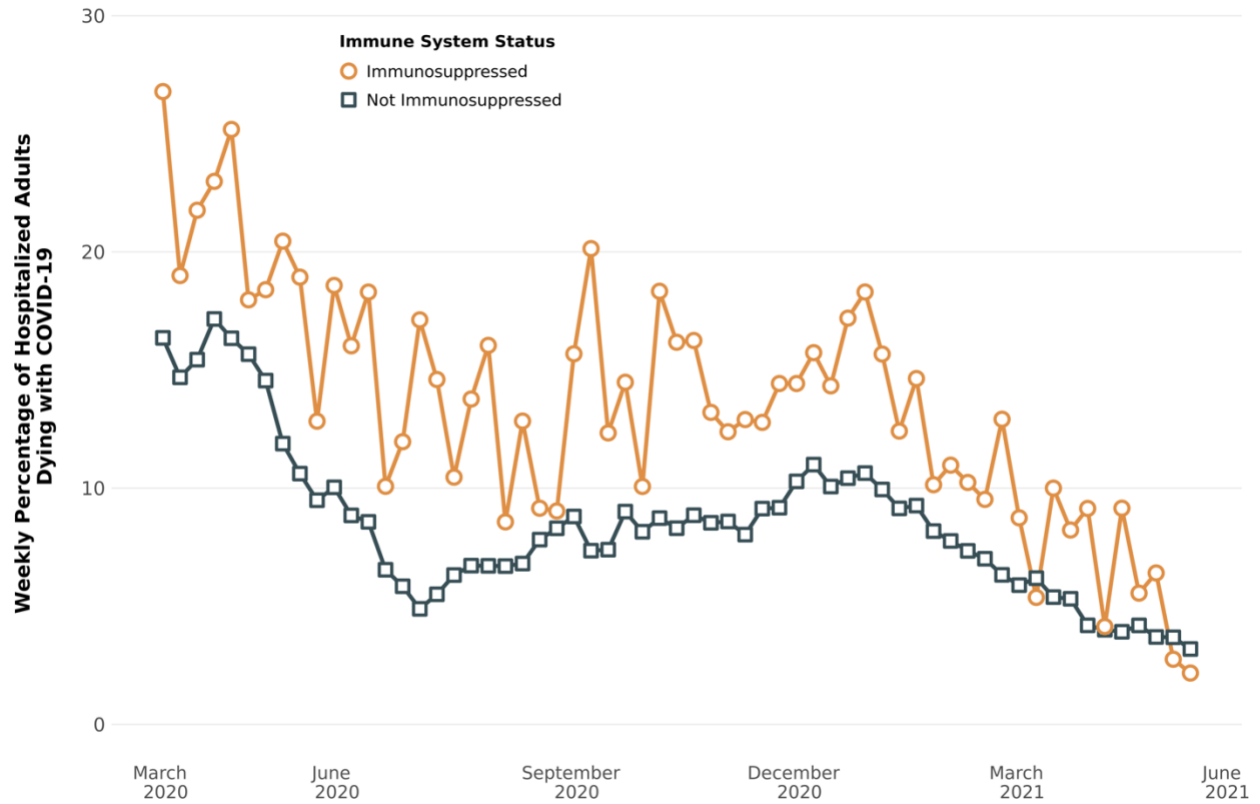

This graph does not present data before March 18, 2020 and after June 2, 2021, where the small number of people at risk may not accurately reflect patterns.

**eFigure 7. Association Between Chronic Immunosuppression and Invasive Mechanical Ventilation Among Males, by Medication Classes.**

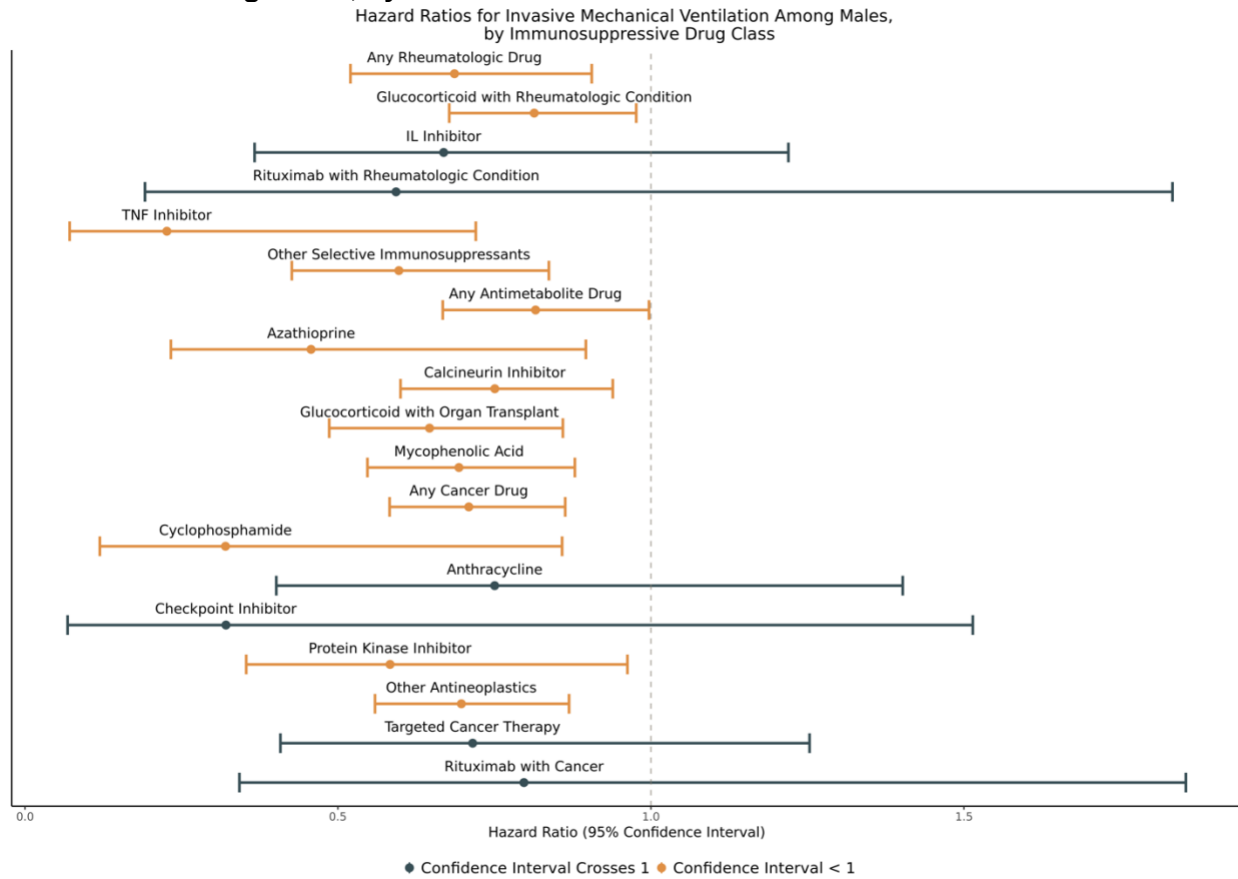

The hazard ratio calculated for janus kinase (JAK) inhibitors was 4.90 (95% confidence interval 0.44-54.97), and is not represented on this plot.



**eFigure 8. Association Between Chronic Immunosuppression and Invasive Mechanical Ventilation Among Females, by Medication Classes.**

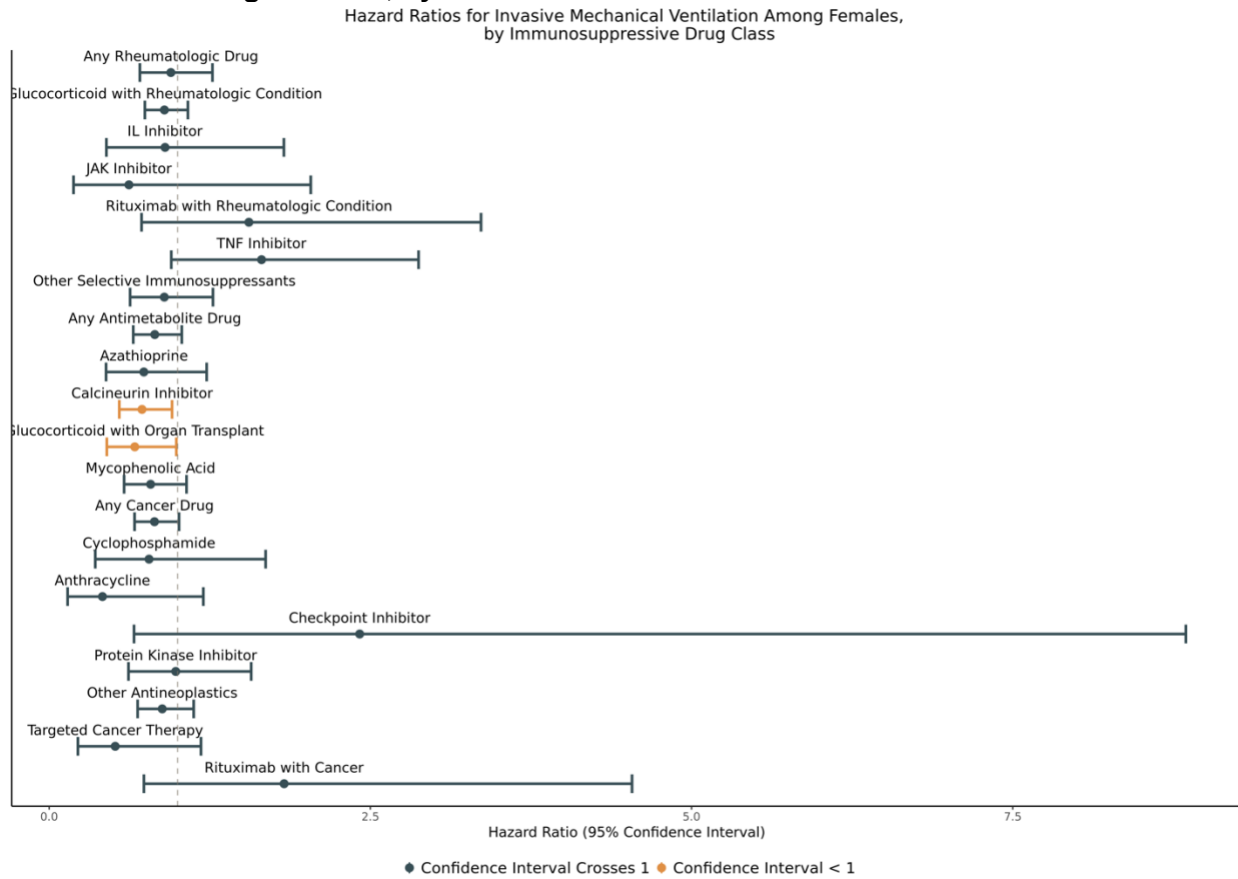

**eFigure 9. Association Between Chronic Immunosuppression and In-Hospital Death Among Males, by Medication Classes.**

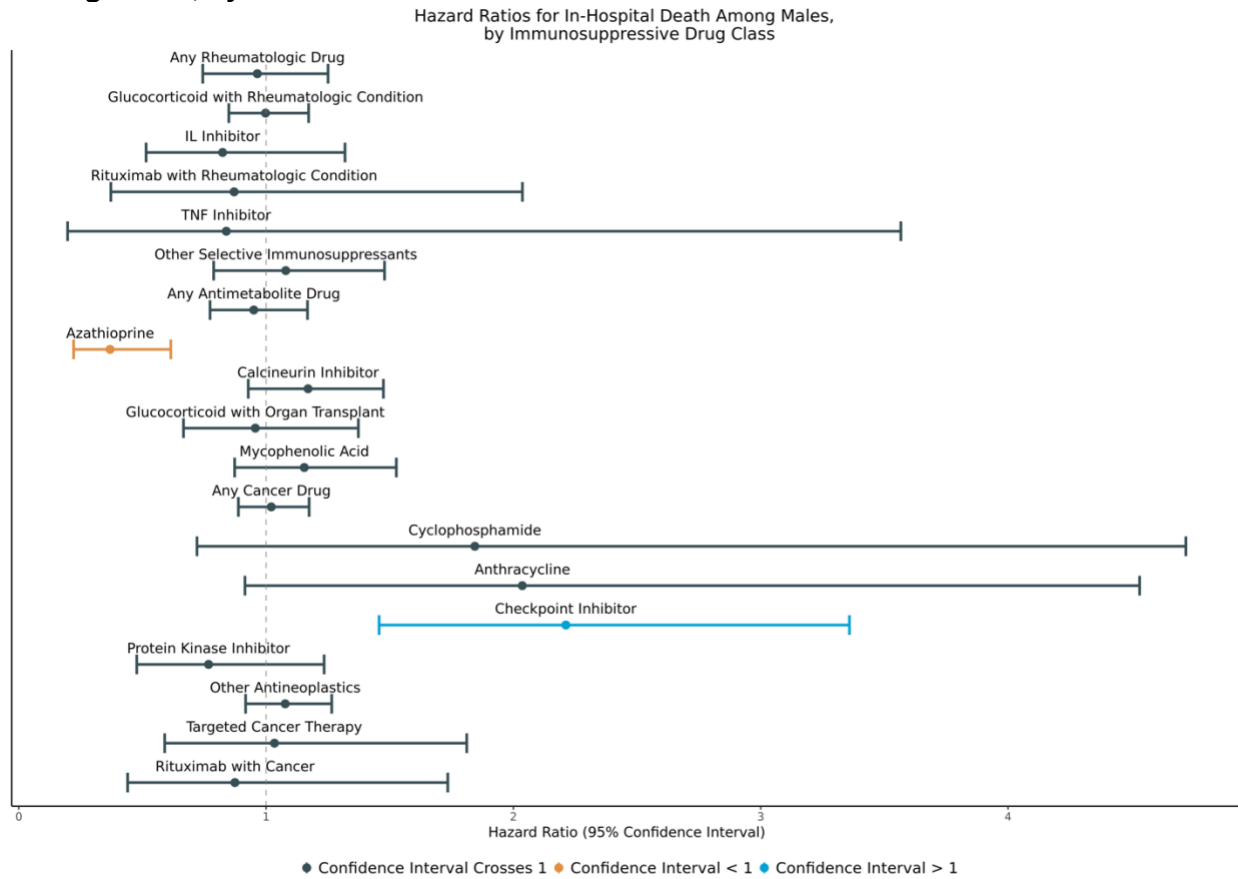

There were no males with janus kinase (JAK) inhibitors who required invasive mechanical ventilation in the propensity score matched cohort.

**eFigure 10. Association Between Chronic Immunosuppression and In-Hospital Death Among Females, by Medication Classes.**

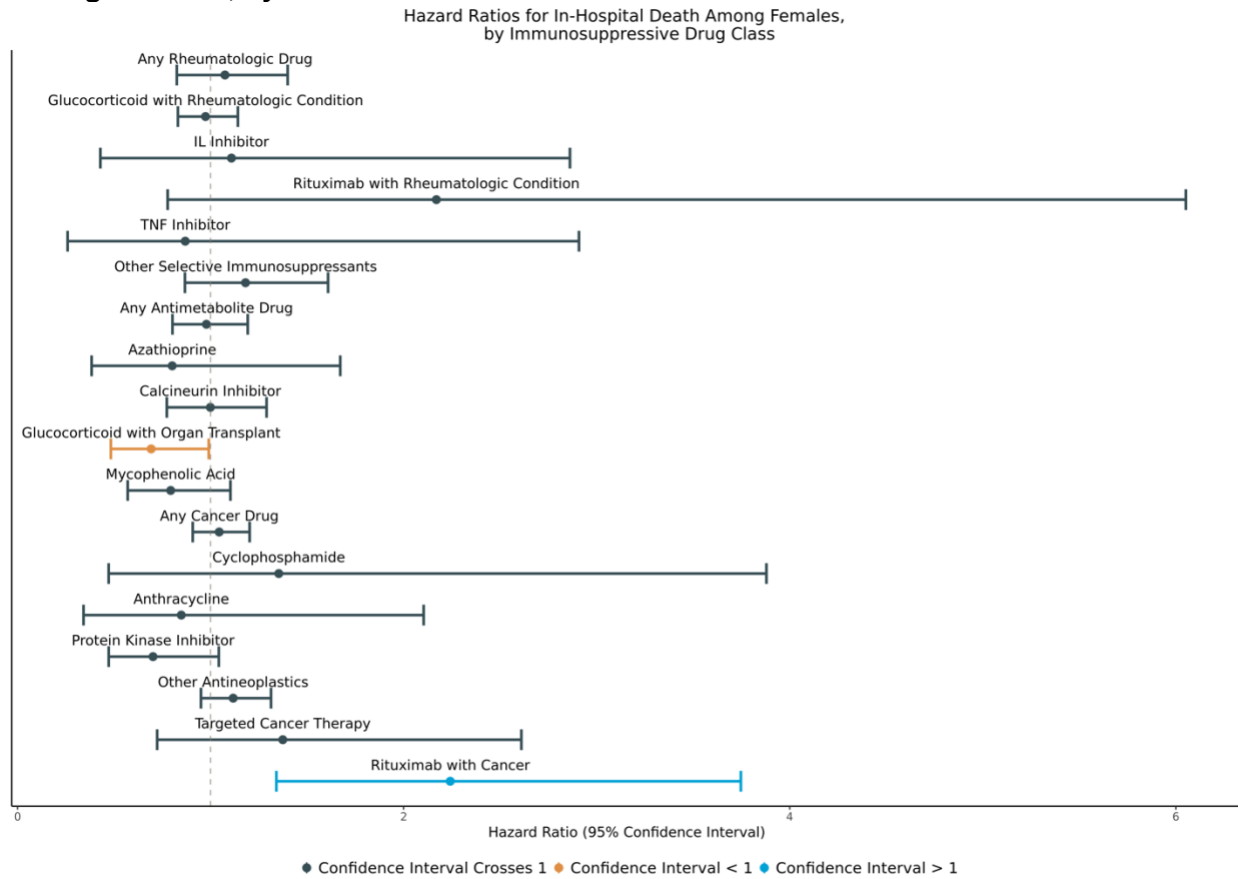

The hazard ratio calculated for checkpoint inhibitors was 2.89 (95% confidence interval 0.71-11.76), and is not represented on this plot.
